# Supplementary material
Source: publisher figshare collection journal article supplement (https://gsajournals.figshare.com/ndownloader/files/29052267)
Supplement: Supplementary file 1 [file 29052267]

**Figure S2. Sex-diplotype associations in the F2 generation.** At the SD locus, the F1 male passes a Y haplotype of *B. variegata* ancestry on to his sons and an X haplotype of *B. bombina* ancestry on to his daughters. This produces a strict association between sex and homozygous diplotype in the F2 generation. The same pattern results in a ZW system. The association gradually weakens as one moves away from the SD locus.
